# Supplementary material for: Family Caregivers' Experiences of Caring for Patients with COVID-19: A Phenomenological Study
Source: Research Square preprint supplement (doi:10.21203/rs.3.rs-107195/v1), 2020-12-02
Supplement: Supplementary file 1 [file f56dd443a69c216bea2aab34.docx]

**راهنمای مصاحبه**

**الف) سوالات اصلی**

1. لطفا تجارب مراقبت از بیمار مبتلا به کرونا ویروس را شرح دهید.
2. چه تجارب منفی در هنگام مراقبت از بیمار مبتلا به کرونا ویروس داشتید؟
3. چه تجارب مثبتی در هنگام مراقبت از بیمار مبتلا به کرونا ویروس داشتید؟
4. لطفا مشکلات و چالش هایی که در مراقبت از بیمار مبتلا به کرونا ویروس داشتید بیان کنید.
5. لطفا تسهیل کننده هایی که به شما در انجام وظایف و مسئولیتهای مراقبتی کمک می کرد را بیان کنید.

**ب) سوالات پیگیری**

1. می توانید بیشتر توضیح دهید؟ (در هر سوال در صورت نیاز)

2. می توانید یک مثال بزنید؟

**ج) در پایان مصاحبه**

آیا چیز دیگری هست که بخواهید اضافه کنید و از شما نپرسیده باشم؟
